# Supplementary material for: Unraveling Evolutionary Dynamics: Comparative Analysis of Chloroplast Genome of <em>Cleomella serrulata</em>
Source: Preprints.org preprint supplement (doi:10.20944/preprints202407.2154.v1), 2024-07-26
Supplement: Supplementary file 1 [file supplementary]

| <b>Position</b> | <b>Strand</b> | <b>CDS</b> | <b>function</b>                       |
|-----------------|---------------|------------|---------------------------------------|
| 97882           | 98115 -       | rps12      | ribosomal protein S12"                |
| 139889          | 140122 +      | rps12      | ribosomal protein S12"                |
| 456             | 1517 -        | psbA       | PSII 32 KDa protein"                  |
| 32471           | 33343 +       | psbA       | PSII 32 KDa protein"                  |
| 2144            | 3718 -        | matK       | maturase K"                           |
| 121561          | 121653 -      | matK       | maturase K"                           |
| 5257            | 5490 -        | rps16      | ribosomal protein S16"                |
| 6353            | 6400 -        | rps16      | ribosomal protein S16"                |
| 7134            | 7319 +        | psbK       | PSII K protein"                       |
| 135391          | 135444 -      | psbK       | PSII K protein"                       |
| 7756            | 7866 +        | psbI       | PSII I protein"                       |
| 5245            | 5304 +        | psbI       | PSII I protein"                       |
| 10125           | 11612 -       | atpA       | ATPase alpha subunit"                 |
| 52702           | 53598 -       | atpA       | ATPase alpha subunit"                 |
| 11677           | 12087 -       | atpF       | ATPase I subunit"                     |
| 12818           | 12964 -       | atpF       | ATPase I subunit"                     |
| 13379           | 13624 -       | atpH       | ATPase III subunit"                   |
| 147012          | 147056 -      | atpH       | ATPase III subunit"                   |
| 14356           | 15102 -       | atpI       | ATPase a subunit"                     |
| 124918          | 125028 -      | atpI       | ATPase a subunit"                     |
| 15364           | 16074 -       | rps2       | ribosomal protein S2"                 |
| 90081           | 90185 -       | rps2       | ribosomal protein S2"                 |
| 16291           | 20448 -       | rpoC2      | RNA polymerase beta" subunit"         |
| 37468           | 37524 +       | rpoC2      | RNA polymerase beta" subunit"         |
| 20637           | 22256 -       | rpoC1      | RNA polymerase beta' subunit"         |
| 23018           | 23461 -       | rpoC1      | RNA polymerase beta' subunit"         |
| 23488           | 26706 -       | rpoB       | RNA polymerase beta subunit"          |
| 76835           | 76888 -       | rpoB       | RNA polymerase beta subunit"          |
| 28267           | 28356 +       | petN       | cytochrome b6/f complex subunit VIII" |
| 93928           | 93960 -       | petN       | cytochrome b6/f complex subunit VIII" |
| 28931           | 29035 -       | psbM       | PSII low MW protein"                  |
| 32444           | 33505 +       | psbD       | PSII D2 protein"                      |
| 609             | 1496 -        | psbD       | PSII D2 protein"                      |
| 33489           | 34874 +       | psbC       | PSII 43 KDa protein"                  |
| 71862           | 72209 +       | psbC       | PSII 43 KDa protein"                  |
| 35524           | 35712 +       | psbZ       | photosystem II protein Z"             |
| 42231           | 42320 -       | psbZ       | photosystem II protein Z"             |
| 36711           | 37013 -       | rps14      | ribosomal protein S14"                |

|        |          |       |                                         |
|--------|----------|-------|-----------------------------------------|
| 139013 | 139150 - | rps14 | ribosomal protein S14"                  |
| 37145  | 39349 -  | psaB  | PSI P700 apoprotein A2"                 |
| 39393  | 41534 -  | psaB  | PSI P700 apoprotein A2"                 |
| 39375  | 41627 -  | psaA  | PSI P700 apoprotein A1"                 |
| 37166  | 39328 -  | psaA  | PSI P700 apoprotein A1"                 |
| 43264  | 43494 -  | ycf3  | photosystem I assembly protein Ycf3"    |
| 42310  | 42462 -  | ycf3  | photosystem I assembly protein Ycf3"    |
| 44976  | 45581 -  | rps4  | ribosomal protein S4"                   |
| 15991  | 16095 -  | rps4  | ribosomal protein S4"                   |
| 48432  | 48908 -  | ndhJ  | NADH dehydrogenase subunit J"           |
| 76885  | 76962 -  | ndhJ  | NADH dehydrogenase subunit J"           |
| 49016  | 49693 -  | psbG  | photosystem II G protein"               |
| 39887  | 40012 +  | psbG  | photosystem II G protein"               |
| 49750  | 50112 -  | ndhC  | NADH dehydrogenase subunit C"           |
| 55286  | 55357 -  | ndhC  | NADH dehydrogenase subunit C"           |
| 51911  | 52309 -  | atpE  | ATPase epsilon subunit"                 |
| 123002 | 123109 - | atpE  | ATPase epsilon subunit"                 |
| 52306  | 53802 -  | atpB  | ATPase beta subunit"                    |
| 10263  | 11321 -  | atpB  | ATPase beta subunit"                    |
| 54597  | 56027 +  | rbcl  | rubisco Large subunit                   |
| 12783  | 12851 -  | rbcl  | rubisco Large subunit                   |
| 57353  | 58297 +  | accD  | carboxytransferase beta subunit"        |
| 58347  | 58391 +  | accD  | carboxytransferase beta subunit"        |
| 58857  | 58970 +  | psaI  | PSI I protein"                          |
| 38829  | 38915 -  | psaI  | PSI I protein"                          |
| 59396  | 59950 +  | ycf4  | photosystem I assembly protein Ycf4"    |
| 114210 | 114278 + | ycf4  | photosystem I assembly protein Ycf4"    |
| 60329  | 61018 +  | cemA  | putative heme-binding protein"          |
| 100661 | 100717 - | cemA  | putative heme-binding protein"          |
| 61247  | 62209 +  | petA  | cytochrome f"                           |
| 63336  | 63371 -  | psbJ  | PSII component"                         |
| 63515  | 63631 -  | psbL  | PSII L protein"                         |
| 40101  | 40133 -  | psbL  | PSII L protein"                         |
| 63653  | 63772 -  | psbF  | PSII cytochrome b559"                   |
| 23358  | 23399 +  | psbF  | PSII cytochrome b559"                   |
| 63782  | 64033 -  | psbE  | PSII cytochrome b559"                   |
| 49440  | 49631 +  | psbE  | PSII cytochrome b559"                   |
| 65192  | 65287 +  | petL  | cytochrome b/f complex 3.5 kDa subunit" |
| 101572 | 101643 - | petL  | cytochrome b/f complex 3.5 kDa subunit" |

|        |          |       |                                 |
|--------|----------|-------|---------------------------------|
| 65475  | 65588 +  | petG  | cytochrome b subunit V"         |
| 103984 | 104073 - | petG  | cytochrome b subunit V"         |
| 66314  | 66454 +  | psaJ  | PSI J protein"                  |
| 6683   | 6805 +   | psaJ  | PSI J protein"                  |
| 66884  | 67084 +  | rpl33 | ribosomal protein L33"          |
| 127624 | 127668 - | rpl33 | ribosomal protein L33"          |
| 67235  | 67489 +  | rps18 | ribosomal protein S18"          |
| 67842  | 68147 -  | rpl20 | ribosomal protein L20"          |
| 62672  | 62761 -  | rpl20 | ribosomal protein L20"          |
| 97882  | 98115 -  | rps12 | ribosomal protein S12"          |
| 139889 | 140122 + | rps12 | ribosomal protein S12"          |
| 70110  | 70403 -  | clpP  | ATP-dependent protease subunit" |
| 69294  | 69521 -  | clpP  | ATP-dependent protease subunit" |
| 71865  | 73391 +  | psbB  | PSII 47KDa protein"             |
| 33546  | 34370 +  | psbB  | PSII 47KDa protein"             |
| 73568  | 73669 +  | psbT  | PSII T protein"                 |
| 116249 | 116290 - | psbT  | PSII T protein"                 |
| 73735  | 73866 -  | psbN  | PSII low MW protein"            |
| 59588  | 59623 -  | psbN  | PSII low MW protein"            |
| 73971  | 74195 +  | psbH  | PSII 10KDa phosphoprotein"      |
| 120848 | 121051 + | psbH  | PSII 10KDa phosphoprotein"      |
| 75144  | 75791 +  | petB  | cytochrome B6"                  |
| 80369  | 80497 +  | petB  | cytochrome B6"                  |
| 76761  | 77237 +  | petD  | cytochrome b/f"                 |
| 148091 | 148216 - | petD  | cytochrome b/f"                 |
| 77443  | 78426 -  | rpoA  | RNA polymerase alpha subunit"   |
| 140673 | 140753 - | rpoA  | RNA polymerase alpha subunit"   |
| 78516  | 78908 -  | rps11 | ribosomal protein S11"          |
| 6055   | 6162 -   | rps11 | ribosomal protein S11"          |
| 79041  | 79154 -  | rpl36 | ribosomal protein L36"          |
| 107909 | 107929 - | rpl36 | ribosomal protein L36"          |
| 79632  | 80036 -  | rps8  | ribosomal protein S8"           |
| 80875  | 80922 -  | rps8  | ribosomal protein S8"           |
| 80270  | 80638 -  | rpl14 | ribosomal protein L14"          |
| 84014  | 84046 +  | rpl14 | ribosomal protein L14"          |
| 80760  | 81161 -  | rpl16 | ribosomal protein L16"          |
| 4143   | 4196 +   | rpl16 | ribosomal protein L16"          |
| 82489  | 83145 -  | rps3  | ribosomal protein S3"           |
| 83610  | 83888 -  | rps19 | ribosomal protein S19"          |

|        |          |       |                                   |
|--------|----------|-------|-----------------------------------|
| 154116 | 154229 + | rps19 | ribosomal protein S19"            |
| 85058  | 85453 -  | rpl2  | ribosomal protein L2"             |
| 152551 | 152946 + | rpl2  | ribosomal protein L2"             |
| 85472  | 85753 -  | rpl23 | ribosomal protein L23"            |
| 152251 | 152532 + | rpl23 | ribosomal protein L23"            |
| 145006 | 151923 - | ycf2  | Ycf2"                             |
| 86081  | 92998 +  | ycf2  | Ycf2"                             |
| 94263  | 95042 -  | ndhB  | NADH dehydrogenase subunit 2"     |
| 142962 | 143741 + | ndhB  | NADH dehydrogenase subunit 2"     |
| 96800  | 97267 -  | rps7  | ribosomal protein S7"             |
| 140737 | 141204 + | rps7  | ribosomal protein S7"             |
| 128068 | 129084 - | ycf1  | Ycf1.1"                           |
| 108938 | 109927 + | ycf1  | Ycf1.1"                           |
| 109967 | 112156 - | ndhF  | NADH dehydrogenase subunit 5"     |
| 115625 | 116485 - | ndhF  | NADH dehydrogenase subunit 5"     |
| 112796 | 112954 + | rpl32 | ribosomal protein L32"            |
| 97633  | 97683 -  | rpl32 | ribosomal protein L32"            |
| 114075 | 115073 + | ccsA  | cytochrome c biogenesis protein"  |
| 142327 | 142461 - | ccsA  | cytochrome c biogenesis protein"  |
| 115316 | 116836 - | ndhD  | NADH dehydrogenase subunit 4"     |
| 110675 | 111790 - | ndhD  | NADH dehydrogenase subunit 4"     |
| 116975 | 117220 - | psaC  | PSI 9KDa protein"                 |
| 119057 | 119242 - | psaC  | PSI 9KDa protein"                 |
| 117462 | 117767 - | ndhE  | NADH dehydrogenase subunit 4L"    |
| 118110 | 118583 - | ndhG  | NADH dehydrogenase subunit 6"     |
| 49409  | 49618 -  | ndhG  | NADH dehydrogenase subunit 6"     |
| 118919 | 119422 - | ndhI  | NADH dehydrogenase subunit I"     |
| 117023 | 117199 - | ndhI  | NADH dehydrogenase subunit I"     |
| 119559 | 120035 - | ndhA  | NADH dehydrogenase subunit 1"     |
| 121162 | 121692 - | ndhA  | NADH dehydrogenase subunit 1"     |
| 121694 | 122875 - | ndhH  | NADH dehydrogenase 49KDa protein" |
| 122978 | 123244 - | rps15 | ribosomal protein S15"            |
| 51911  | 52018 -  | rps15 | ribosomal protein S15"            |
| 123655 | 129084 - | ycf1  | Ycf1.2"                           |
| 108938 | 109927 + | ycf1  | Ycf1.2"                           |
| 96800  | 97267 -  | rps7  | ribosomal protein S7"             |
| 140737 | 141204 + | rps7  | ribosomal protein S7"             |
| 94263  | 95042 -  | ndhB  | NADH dehydrogenase subunit 2"     |
| 142962 | 143741 + | ndhB  | NADH dehydrogenase subunit 2"     |

|        |          |           |                        |
|--------|----------|-----------|------------------------|
| 145006 | 151923 - | ycf2      | Ycf2"                  |
| 86081  | 92998 +  | ycf2      | Ycf2"                  |
| 85472  | 85753 -  | rpl23     | ribosomal protein L23" |
| 152251 | 152532 + | rpl23     | ribosomal protein L23" |
| 85058  | 85453 -  | rpl2      | ribosomal protein L2"  |
| 152551 | 152946 + | rpl2      | ribosomal protein L2"  |
| 70     | 1 +      | trnH-CAC  |                        |
| 4443   | 1793 +   | trnK-AAA  |                        |
| 6795   | 6724 +   | trnQ-CAA  |                        |
| 7957   | 8044 +   | trnS-AGC  |                        |
| 44653  | 44626 +  | trnS-AGC  |                        |
| 8749   | 9527 +   | trnG-GGA  |                        |
| 9732   | 9803 +   | trnR-AGA  |                        |
| 27793  | 27863 +  | trnC-UGC  |                        |
| 30054  | 29981 +  | trnD-GAC  |                        |
| 30572  | 30489 +  | trnY-UAC  |                        |
| 30708  | 30636 +  | trnE-GAA  |                        |
| 31255  | 31326 +  | trnT-ACC  |                        |
| 35073  | 35165 +  | trnS-UCA  |                        |
| 36259  | 36329 +  | trnG-GGC  |                        |
| 36548  | 36475 +  | trnfM-AUG |                        |
| 44565  | 44654 +  | trnS-UCC  |                        |
| 7985   | 7958 +   | trnS-UCC  |                        |
| 46043  | 45971 +  | trnT-ACA  |                        |
| 46811  | 47434 +  | trnL-UUA  |                        |
| 47795  | 47867 +  | trnF-UUC  |                        |
| 51521  | 50830 +  | trnV-GUA  |                        |
| 51706  | 51778 +  | trnM-AUG  |                        |
| 65796  | 65723 +  | trnW-UGG  |                        |
| 65943  | 65870 +  | trnP-CCA  |                        |
| 85992  | 85919 +  | trnI-CAU  |                        |
| 152012 | 152085 + | trnI-CAU  |                        |
| 93679  | 93599 +  | trnL-UUG  |                        |
| 144325 | 144405 + | trnL-UUG  |                        |
| 100036 | 100107 + | trnV-GUC  |                        |
| 137986 | 137915 + | trnV-GUC  |                        |
| 100339 | 101829 + | rrn16S    | ribosomal RNA          |
| 137683 | 136193 + | rrn16S    | ribosomal RNA          |
| 102122 | 103140 + | trnI-AUC  |                        |

|        |          |          |               |
|--------|----------|----------|---------------|
| 135900 | 134882 + | trnI-AUC |               |
| 103205 | 104078 + | trnA-GCA |               |
| 134817 | 133944 + | trnA-GCA |               |
| 104240 | 107048 + | rrn23S   | ribosomal RNA |
| 133782 | 130974 + | rrn23S   | ribosomal RNA |
| 107147 | 107249 + | rrn4.5S  | ribosomal RNA |
| 130875 | 130773 + | rrn4.5S  | ribosomal RNA |
| 107497 | 107617 + | rrn5S    | ribosomal RNA |
| 130525 | 130405 + | rrn5S    | ribosomal RNA |
| 107871 | 107944 + | trnR-CGU |               |
| 130151 | 130078 + | trnR-CGU |               |
| 108617 | 108546 + | trnN-AAC |               |
| 129405 | 129476 + | trnN-AAC |               |
| 113890 | 113969 + | trnL-CUA |               |
| 108617 | 108546 + | trnN-AAC |               |
| 129405 | 129476 + | trnN-AAC |               |
| 107871 | 107944 + | trnR-CGU |               |
| 130151 | 130078 + | trnR-CGU |               |
| 107497 | 107617 + | rrn5S    | ribosomal RNA |
| 130525 | 130405 + | rrn5S    | ribosomal RNA |
| 107147 | 107249 + | rrn4.5S  | ribosomal RNA |
| 130875 | 130773 + | rrn4.5S  | ribosomal RNA |
| 104240 | 107048 + | rrn23S   | ribosomal RNA |
| 133782 | 130974 + | rrn23S   | ribosomal RNA |
| 103205 | 104078 + | trnA-GCA |               |
| 134817 | 133944 + | trnA-GCA |               |
| 102122 | 103140 + | trnI-AUC |               |
| 135900 | 134882 + | trnI-AUC |               |
| 100339 | 101829 + | rrn16S   | ribosomal RNA |
| 137683 | 136193 + | rrn16S   | ribosomal RNA |
| 100036 | 100107 + | trnV-GUC |               |
| 137986 | 137915 + | trnV-GUC |               |
| 93679  | 93599 +  | trnL-UUG |               |
| 144325 | 144405 + | trnL-UUG |               |
| 85992  | 85919 +  | trnI-CAU |               |
| 152012 | 152085 + | trnI-CAU |               |
